# Supplementary material for: Quality of life and healthcare utilization during the COVID-19 pandemic are more restricted in chronically ill than in healthy children: a tertiary care children’s hospital experience
Source: Eur J Pediatr. 2024 Jan 23;183(4):1801–10. doi: 10.1007/s00431-023-05382-6 (PMC11001739; doi:10.1007/s00431-023-05382-6)
Supplement: Supplementary file 1 — Supplementary file1 (PDF 224 KB) [file 431_2023_5382_MOESM1_ESM.pdf]

# Fragebogen

Datum:

No.:

**Bitte vollständig ausfüllen und nur jeweils ein Antwortkreuz setzen. Bei Rückfragen wenden Sie sich gerne an einen der Studienärzte.**

**Dauer: ~ 10 Minuten**

## Einverständnis zur Teilnahme:

Vielen Dank, dass Sie sich bereiterklären an oben genannter Umfragestudie teilzunehmen. Fand eine ausreichende Aufklärung statt, wurden Ihre Fragen beantwortet und wollen Sie an oben genannter Umfragestudie teilnehmen?

|                             |                               |
|-----------------------------|-------------------------------|
| Ja <input type="checkbox"/> | Nein <input type="checkbox"/> |
|-----------------------------|-------------------------------|

## Abschnitt „1“ – Teilnehmer

### 1. Sind Sie Elternteil oder Sorgeberechtigte/r, der das Kind/die Kinder heute begleitet?

|                                     |                                             |                                                                |
|-------------------------------------|---------------------------------------------|----------------------------------------------------------------|
| Elternteil <input type="checkbox"/> | Sorgeberechtigte/r <input type="checkbox"/> | Nicht zutreffend bzw.<br>Keine Angabe <input type="checkbox"/> |
|-------------------------------------|---------------------------------------------|----------------------------------------------------------------|

### 1.1 Welcher Altersgruppe gehören Sie an?

|                                         |                                         |                                         |                                         |                                         |                                         |                                     |
|-----------------------------------------|-----------------------------------------|-----------------------------------------|-----------------------------------------|-----------------------------------------|-----------------------------------------|-------------------------------------|
| 16-20 Jahre<br><input type="checkbox"/> | 21-30 Jahre<br><input type="checkbox"/> | 31-40 Jahre<br><input type="checkbox"/> | 41-50 Jahre<br><input type="checkbox"/> | 51-60 Jahre<br><input type="checkbox"/> | 61-70 Jahre<br><input type="checkbox"/> | > 70 Jahre <input type="checkbox"/> |
|-----------------------------------------|-----------------------------------------|-----------------------------------------|-----------------------------------------|-----------------------------------------|-----------------------------------------|-------------------------------------|

### 1.2 Welches Geschlecht haben Sie?

|                                   |                                   |                                 |
|-----------------------------------|-----------------------------------|---------------------------------|
| Männlich <input type="checkbox"/> | Weiblich <input type="checkbox"/> | Divers <input type="checkbox"/> |
|-----------------------------------|-----------------------------------|---------------------------------|

### 1.3 Was ist ihr Beruf?

|                                        |                                                               |                                           |                                                   |                                            |                                        |                                                                            |
|----------------------------------------|---------------------------------------------------------------|-------------------------------------------|---------------------------------------------------|--------------------------------------------|----------------------------------------|----------------------------------------------------------------------------|
| Student/in<br><input type="checkbox"/> | Wissenschaftlicher<br>Mitarbeiter/in <input type="checkbox"/> | Angestellte/r<br><input type="checkbox"/> | Selbstständige<br>Arbeit <input type="checkbox"/> | Arbeitssuchend<br><input type="checkbox"/> | Rentner/in<br><input type="checkbox"/> | Nicht<br>zutreffend<br>bzw.<br>Keine<br>Angabe<br><input type="checkbox"/> |
|----------------------------------------|---------------------------------------------------------------|-------------------------------------------|---------------------------------------------------|--------------------------------------------|----------------------------------------|----------------------------------------------------------------------------|

### 1.4 Sind Sie im Gesundheitswesen tätig? (z.B. Pflege, Ärztin/Arzt, Med. Fachangestellte/r)

|                             |                               |                                       |
|-----------------------------|-------------------------------|---------------------------------------|
| Ja <input type="checkbox"/> | Nein <input type="checkbox"/> | Keine Angabe <input type="checkbox"/> |
|-----------------------------|-------------------------------|---------------------------------------|

## **Abschnitt „2“ – Neuartiges Corona-Virus / Corona-Pandemie**

### **2.1 Waren Sie oder andere Personen, die mit Ihrem Kind / Ihren Kindern in einem Haushalt leben an COVID-19 erkrankt? (Achtung: Die Kinder selbst sind nicht gemeint!)**

|                                                 |                                        |                                                   |                                          |                                                    |
|-------------------------------------------------|----------------------------------------|---------------------------------------------------|------------------------------------------|----------------------------------------------------|
| Ja, mit positivem Test <input type="checkbox"/> | Ja, ohne Test <input type="checkbox"/> | Nein, mit negativem Test <input type="checkbox"/> | Nein, ohne Test <input type="checkbox"/> | Weiß nicht / Keine Angabe <input type="checkbox"/> |
|-------------------------------------------------|----------------------------------------|---------------------------------------------------|------------------------------------------|----------------------------------------------------|

### **2.2 Kennen Sie jemanden der an COVID-19 erkrankt ist / war oder arbeiten Sie mit Menschen, die an COVID-19 erkrankt sind / waren?**

|                             |                               |                                                    |
|-----------------------------|-------------------------------|----------------------------------------------------|
| Ja <input type="checkbox"/> | Nein <input type="checkbox"/> | Weiß nicht / Keine Angabe <input type="checkbox"/> |
|-----------------------------|-------------------------------|----------------------------------------------------|

### **2.3 Wie groß ist Ihre Sorge selbst an COVID-19 zu erkranken?**

|                                    |                               |                                  |                                |                                    |                                                    |
|------------------------------------|-------------------------------|----------------------------------|--------------------------------|------------------------------------|----------------------------------------------------|
| Sehr groß <input type="checkbox"/> | Groß <input type="checkbox"/> | Moderat <input type="checkbox"/> | Klein <input type="checkbox"/> | Gar nicht <input type="checkbox"/> | Weiß nicht / Keine Angabe <input type="checkbox"/> |
|------------------------------------|-------------------------------|----------------------------------|--------------------------------|------------------------------------|----------------------------------------------------|

### **2.4 Wie groß ist Ihre Sorge, dass Ihr(e) Kind(er) an COVID-19 erkrankt / erkranken?**

|                                    |                               |                                  |                                |                                    |                                                    |
|------------------------------------|-------------------------------|----------------------------------|--------------------------------|------------------------------------|----------------------------------------------------|
| Sehr groß <input type="checkbox"/> | Groß <input type="checkbox"/> | Moderat <input type="checkbox"/> | Klein <input type="checkbox"/> | Gar nicht <input type="checkbox"/> | Weiß nicht / Keine Angabe <input type="checkbox"/> |
|------------------------------------|-------------------------------|----------------------------------|--------------------------------|------------------------------------|----------------------------------------------------|

**Die nun folgenden Fragen 2.5 – 2.9 beziehen sich auf den Zeitraum der gesamten Corona-Pandemie!**

### **2.5 Wie groß schätzen Sie das Risiko ein, dass Ihr(e) Kind(er) sich bei Besorgungen des Alltags (z.B. Einkaufen im Supermarkt, Besuch eines Spielplatzes) ansteckt / anstecken?**

|                                    |                               |                                  |                                |                                    |                                                    |
|------------------------------------|-------------------------------|----------------------------------|--------------------------------|------------------------------------|----------------------------------------------------|
| Sehr groß <input type="checkbox"/> | Groß <input type="checkbox"/> | Moderat <input type="checkbox"/> | Klein <input type="checkbox"/> | Gar nicht <input type="checkbox"/> | Weiß nicht / Keine Angabe <input type="checkbox"/> |
|------------------------------------|-------------------------------|----------------------------------|--------------------------------|------------------------------------|----------------------------------------------------|

### **2.6 Wie groß schätzen Sie das Risiko ein, dass Ihr(e) Kind(er) sich bei einem Besuch beim niedergelassenen Kinderarzt / Hausarzt mit dem Corona-Virus ansteckt / anstecken?**

|                                    |                               |                                  |                                |                                    |                                                    |
|------------------------------------|-------------------------------|----------------------------------|--------------------------------|------------------------------------|----------------------------------------------------|
| Sehr groß <input type="checkbox"/> | Groß <input type="checkbox"/> | Moderat <input type="checkbox"/> | Klein <input type="checkbox"/> | Gar nicht <input type="checkbox"/> | Weiß nicht / Keine Angabe <input type="checkbox"/> |
|------------------------------------|-------------------------------|----------------------------------|--------------------------------|------------------------------------|----------------------------------------------------|

**2.7 Wie groß schätzen Sie das Risiko ein, dass Ihr(e) Kind(er) sich bei einem Besuch in einer Kinderklinik mit dem Corona-Virus ansteckt / anstecken?**

|                                    |                               |                                  |                                |                                    |                                                          |
|------------------------------------|-------------------------------|----------------------------------|--------------------------------|------------------------------------|----------------------------------------------------------|
| Sehr groß <input type="checkbox"/> | Groß <input type="checkbox"/> | Moderat <input type="checkbox"/> | Klein <input type="checkbox"/> | Gar nicht <input type="checkbox"/> | Weiß nicht /<br>Keine Angabe<br><input type="checkbox"/> |
|------------------------------------|-------------------------------|----------------------------------|--------------------------------|------------------------------------|----------------------------------------------------------|

**2.8 Hat die Corona-Pandemie die psychische und / oder körperliche Gesundheit Ihres/r Kind(er) beeinflusst?**

|                                                     |                                                  |                                                  |                                                       |
|-----------------------------------------------------|--------------------------------------------------|--------------------------------------------------|-------------------------------------------------------|
| Ja, negativ beeinflusst<br><input type="checkbox"/> | Ja, positiv beeinflusst <input type="checkbox"/> | Nein, nicht beeinflusst <input type="checkbox"/> | Weiß nicht / Keine Angabe<br><input type="checkbox"/> |
|-----------------------------------------------------|--------------------------------------------------|--------------------------------------------------|-------------------------------------------------------|

**2.9 Hat die Corona-Pandemie die sonstige Lebensqualität Ihres/r Kind(er) beeinflusst?**

|                                                     |                                                  |                                                  |                                                       |
|-----------------------------------------------------|--------------------------------------------------|--------------------------------------------------|-------------------------------------------------------|
| Ja, negativ beeinflusst<br><input type="checkbox"/> | Ja, positiv beeinflusst <input type="checkbox"/> | Nein, nicht beeinflusst <input type="checkbox"/> | Weiß nicht / Keine Angabe<br><input type="checkbox"/> |
|-----------------------------------------------------|--------------------------------------------------|--------------------------------------------------|-------------------------------------------------------|

## Abschnitt „3“ – Kind(er)

### 3.1 Wie viele Kinder haben Sie?

|                                 |                                   |                                   |                                   |                                     |                                          |
|---------------------------------|-----------------------------------|-----------------------------------|-----------------------------------|-------------------------------------|------------------------------------------|
| 1 Kind <input type="checkbox"/> | 2 Kinder <input type="checkbox"/> | 3 Kinder <input type="checkbox"/> | 4 Kinder <input type="checkbox"/> | > 4 Kinder <input type="checkbox"/> | Keine Angabe<br><input type="checkbox"/> |
|---------------------------------|-----------------------------------|-----------------------------------|-----------------------------------|-------------------------------------|------------------------------------------|

### 3.2 Wie alt sind die Kinder? (Hier sind Mehrfachantworten möglich!)

| Kind | 0-1 Jahr<br><small>(Bedeutung:<br/>innerhalb der ersten<br/>24 Lebensmonate)</small> | 2-5 Jahre                | 6-12 Jahre               | 13-18 Jahre              | >18                      | Keine<br>Angabe          |
|------|--------------------------------------------------------------------------------------|--------------------------|--------------------------|--------------------------|--------------------------|--------------------------|
| #1   | <input type="checkbox"/>                                                             | <input type="checkbox"/> | <input type="checkbox"/> | <input type="checkbox"/> | <input type="checkbox"/> | <input type="checkbox"/> |
| #2   | <input type="checkbox"/>                                                             | <input type="checkbox"/> | <input type="checkbox"/> | <input type="checkbox"/> | <input type="checkbox"/> | <input type="checkbox"/> |
| #3   | <input type="checkbox"/>                                                             | <input type="checkbox"/> | <input type="checkbox"/> | <input type="checkbox"/> | <input type="checkbox"/> | <input type="checkbox"/> |
| #4   | <input type="checkbox"/>                                                             | <input type="checkbox"/> | <input type="checkbox"/> | <input type="checkbox"/> | <input type="checkbox"/> | <input type="checkbox"/> |
| #5   | <input type="checkbox"/>                                                             | <input type="checkbox"/> | <input type="checkbox"/> | <input type="checkbox"/> | <input type="checkbox"/> | <input type="checkbox"/> |
| #6   | <input type="checkbox"/>                                                             | <input type="checkbox"/> | <input type="checkbox"/> | <input type="checkbox"/> | <input type="checkbox"/> | <input type="checkbox"/> |
| #7   | <input type="checkbox"/>                                                             | <input type="checkbox"/> | <input type="checkbox"/> | <input type="checkbox"/> | <input type="checkbox"/> | <input type="checkbox"/> |
|      |                                                                                      |                          |                          |                          |                          |                          |

### 3.3 Hat eines Ihrer Kinder eine chronische Erkrankung (z.B. Asthma, Neurodermitis, chronisch entzündliche Darmerkrankung, Rheuma, etc., siehe Definition)?

|                                                                                                         |                                                                                                        |
|---------------------------------------------------------------------------------------------------------|--------------------------------------------------------------------------------------------------------|
| Ja <input type="checkbox"/><br>→ Ab <b>Abschnitt 4</b> weiter ausfüllen<br>(weiter ab Seite 5 bis Ende) | Nein <input type="checkbox"/><br>→ Nur ab <b>Abschnitt 5</b> weiter ausfüllen<br>(ab Seite 9 bis Ende) |
|---------------------------------------------------------------------------------------------------------|--------------------------------------------------------------------------------------------------------|

#### Definition chronischer Erkrankung (im Kindesalter):

- Erkrankung / Zustand besteht seit min. 3 Monaten (Achtung: Kinder unter 1 Jahr hier nicht zu bewerten)<sup>1</sup>
- Erkrankung / Zustand schränkt altersangemessene Aktivitäten ein und / oder hat wiederkehrenden Bedarf einer medizinischen Versorgung / Kontrolluntersuchung<sup>1</sup>
- *Generell gilt: Eine Diagnose durch den Kinderarzt die über einen längeren Zeitraum als 3 Monate besteht gilt als chronische Erkrankung*

<sup>1</sup>Schmidt, Silke & Thyen, Ute. (2008). Was sind chronisch kranke Kinder?. Bundesgesundheitsblatt - Gesundheitsforschung - Gesundheitsschutz. 51. 585-591. 10.1007/s00103-008-0534-5.

#### 3.3.1 Falls „JA“, mit welchem Ihrer Kinder stellen Sie sich heute mit Termin oder einer akuten Erkrankung in der Kinderklinik vor?

|                                                                   |                                                             |
|-------------------------------------------------------------------|-------------------------------------------------------------|
| Mein(e) chronisch krankes/en<br>Kind(er) <input type="checkbox"/> | Mein(e) sonst gesunden<br>Kind(er) <input type="checkbox"/> |
|-------------------------------------------------------------------|-------------------------------------------------------------|

## Abschnitt „4“ – Familien mit chronisch kranken Kindern / Vorgehen mit chronisch kranken Kindern

### 4.1 Wie viele Ihrer Kinder haben eine chronische Erkrankung?

|                                 |                                   |                                   |                                   |                                     |                                       |
|---------------------------------|-----------------------------------|-----------------------------------|-----------------------------------|-------------------------------------|---------------------------------------|
| 1 Kind <input type="checkbox"/> | 2 Kinder <input type="checkbox"/> | 3 Kinder <input type="checkbox"/> | 4 Kinder <input type="checkbox"/> | > 4 Kinder <input type="checkbox"/> | Keine Angabe <input type="checkbox"/> |
|---------------------------------|-----------------------------------|-----------------------------------|-----------------------------------|-------------------------------------|---------------------------------------|

### 4.2 Um was für eine Art der chronischen Erkrankung handelt es sich? (Hier sind Mehrfachantworten möglich!)

| Kind | Atemwege<br>(z.B. Asthma) | Leber<br>und/oder<br>Darm | Herz                     | Niere                    | Rheuma<br>/Gelenke       | Hämatologie<br>/Onkologie<br>(z.B.<br>Krebserkrankung) | Stoffwechsel<br>(z.B. Diabetes<br>mellitus) | anderes                  | Keine<br>Angabe<br>/ weiß<br>nicht |
|------|---------------------------|---------------------------|--------------------------|--------------------------|--------------------------|--------------------------------------------------------|---------------------------------------------|--------------------------|------------------------------------|
| #1   | <input type="checkbox"/>  | <input type="checkbox"/>  | <input type="checkbox"/> | <input type="checkbox"/> | <input type="checkbox"/> | <input type="checkbox"/>                               | <input type="checkbox"/>                    | <input type="checkbox"/> | <input type="checkbox"/>           |
| #2   | <input type="checkbox"/>  | <input type="checkbox"/>  | <input type="checkbox"/> | <input type="checkbox"/> | <input type="checkbox"/> | <input type="checkbox"/>                               | <input type="checkbox"/>                    | <input type="checkbox"/> | <input type="checkbox"/>           |
| #3   | <input type="checkbox"/>  | <input type="checkbox"/>  | <input type="checkbox"/> | <input type="checkbox"/> | <input type="checkbox"/> | <input type="checkbox"/>                               | <input type="checkbox"/>                    | <input type="checkbox"/> | <input type="checkbox"/>           |
| #4   | <input type="checkbox"/>  | <input type="checkbox"/>  | <input type="checkbox"/> | <input type="checkbox"/> | <input type="checkbox"/> | <input type="checkbox"/>                               | <input type="checkbox"/>                    | <input type="checkbox"/> | <input type="checkbox"/>           |
| #5   | <input type="checkbox"/>  | <input type="checkbox"/>  | <input type="checkbox"/> | <input type="checkbox"/> | <input type="checkbox"/> | <input type="checkbox"/>                               | <input type="checkbox"/>                    | <input type="checkbox"/> | <input type="checkbox"/>           |
| #6   | <input type="checkbox"/>  | <input type="checkbox"/>  | <input type="checkbox"/> | <input type="checkbox"/> | <input type="checkbox"/> | <input type="checkbox"/>                               | <input type="checkbox"/>                    | <input type="checkbox"/> | <input type="checkbox"/>           |
| #7   | <input type="checkbox"/>  | <input type="checkbox"/>  | <input type="checkbox"/> | <input type="checkbox"/> | <input type="checkbox"/> | <input type="checkbox"/>                               | <input type="checkbox"/>                    | <input type="checkbox"/> | <input type="checkbox"/>           |

### 4.3 War (oder ist) ihr chronisch krankes Kind / Kinder an COVID-19 erkrankt?

|                                                 |                                        |                                                   |                                          |                                                    |
|-------------------------------------------------|----------------------------------------|---------------------------------------------------|------------------------------------------|----------------------------------------------------|
| Ja, mit positivem Test <input type="checkbox"/> | Ja, ohne Test <input type="checkbox"/> | Nein, mit negativem Test <input type="checkbox"/> | Nein, ohne Test <input type="checkbox"/> | Weiß nicht / Keine Angabe <input type="checkbox"/> |
|-------------------------------------------------|----------------------------------------|---------------------------------------------------|------------------------------------------|----------------------------------------------------|

### 4.4 Nimmt eines Ihrer chronisch kranken Kinder aufgrund seiner Erkrankung regelmäßig/dauerhaft Medikamente ein?

|                             |                               |                                                    |
|-----------------------------|-------------------------------|----------------------------------------------------|
| Ja <input type="checkbox"/> | Nein <input type="checkbox"/> | Weiß nicht / Keine Angabe <input type="checkbox"/> |
|-----------------------------|-------------------------------|----------------------------------------------------|

#### 4.4.1 Falls „JA“, kam es aufgrund der Corona-Pandemie zu Versorgungsproblemen mit den benötigten Medikamenten?

|                             |                               |                                                    |
|-----------------------------|-------------------------------|----------------------------------------------------|
| Ja <input type="checkbox"/> | Nein <input type="checkbox"/> | Weiß nicht / Keine Angabe <input type="checkbox"/> |
|-----------------------------|-------------------------------|----------------------------------------------------|

### 4.5 Macht die chronische Erkrankung eines / mehrerer Ihrer Kinder regelmäßige ambulante Arztbesuche und / oder stationäre Aufnahmen in einer Klinik notwendig?

|                             |                               |                                                    |
|-----------------------------|-------------------------------|----------------------------------------------------|
| Ja <input type="checkbox"/> | Nein <input type="checkbox"/> | Weiß nicht / Keine Angabe <input type="checkbox"/> |
|-----------------------------|-------------------------------|----------------------------------------------------|

**4.6 Kam es aufgrund der Corona-Pandemie zu Terminverschiebungen oder -ausfällen von ambulanten Vorstellungen bei Ihrer Kinderarzt/ Hausarzt oder in einer Spezialsprechstunde (z.B. in einer Kinderklinik) für eines Ihrer chronisch kranken Kinder?**

|                                                                        |                                                                |                                                         |                                                                           |                                                    |
|------------------------------------------------------------------------|----------------------------------------------------------------|---------------------------------------------------------|---------------------------------------------------------------------------|----------------------------------------------------|
| Ja, die Klinik/Praxis hat den Termin abgesagt <input type="checkbox"/> | Ja, ich/wir haben den Termin abgesagt <input type="checkbox"/> | Nein, keine Terminverschiebung <input type="checkbox"/> | Nein, kein Arztbesuch war geplant / erforderlich <input type="checkbox"/> | Weiß nicht / Keine Angabe <input type="checkbox"/> |
|------------------------------------------------------------------------|----------------------------------------------------------------|---------------------------------------------------------|---------------------------------------------------------------------------|----------------------------------------------------|

**4.6.1 Falls „JA“: Wo war dieser Termin geplant?**

|                                                                 |                                                                                              |                                                                                                                       |                                                                      |                                                    |
|-----------------------------------------------------------------|----------------------------------------------------------------------------------------------|-----------------------------------------------------------------------------------------------------------------------|----------------------------------------------------------------------|----------------------------------------------------|
| Niedergelassener Kinderarzt / Hausarzt <input type="checkbox"/> | Spezialsprechstunde (z.B. Asthmasprechstunde in einer Kinderklinik) <input type="checkbox"/> | Ambulante Intervention / Diagnostik (z.B. ambulante OP, Bildgebung wie Röntgen/CT/MRT, etc.) <input type="checkbox"/> | Sonstiges (z.B. Physiotherapie, Reha, etc.) <input type="checkbox"/> | Weiß nicht / Keine Angabe <input type="checkbox"/> |
|-----------------------------------------------------------------|----------------------------------------------------------------------------------------------|-----------------------------------------------------------------------------------------------------------------------|----------------------------------------------------------------------|----------------------------------------------------|

**4.6.2 Falls „JA“, waren davon notwendige Termine für reguläre Vorsorgeuntersuchungen (U-Untersuchungen) oder Impfungen betroffen?**

|                             |                               |                                                    |
|-----------------------------|-------------------------------|----------------------------------------------------|
| Ja <input type="checkbox"/> | Nein <input type="checkbox"/> | Weiß nicht / Keine Angabe <input type="checkbox"/> |
|-----------------------------|-------------------------------|----------------------------------------------------|

**4.6.3 Falls „JA, ich/wir haben den Termin abgesagt“: Haben Sie aus Sorge vor einer Ansteckung mit dem Corona-Virus den ambulanten Termin abgesagt oder verschoben?**

|                             |                               |                                                    |
|-----------------------------|-------------------------------|----------------------------------------------------|
| Ja <input type="checkbox"/> | Nein <input type="checkbox"/> | Weiß nicht / Keine Angabe <input type="checkbox"/> |
|-----------------------------|-------------------------------|----------------------------------------------------|

**4.6.4 Falls „JA, die Klinik/Praxis hat den Termin abgesagt“, wurden als Ersatz für die Vorstellung in der Spezialsprechstunde alternative Möglichkeiten angeboten, wie z.B. Videosprechstunde, Telefonsprechstunde, ausführliche Telefonate o.ä.?**

|                             |                               |                                                    |
|-----------------------------|-------------------------------|----------------------------------------------------|
| Ja <input type="checkbox"/> | Nein <input type="checkbox"/> | Weiß nicht / Keine Angabe <input type="checkbox"/> |
|-----------------------------|-------------------------------|----------------------------------------------------|

**4.7 Haben Sie das Angebot einer kontaktlosen medizinischen Versorgung wie Videosprechstunde, Telefonsprechstunde, ausführliche Telefonate oder Ähnliches. genutzt?**

|                             |                               |                                                    |
|-----------------------------|-------------------------------|----------------------------------------------------|
| Ja <input type="checkbox"/> | Nein <input type="checkbox"/> | Weiß nicht / Keine Angabe <input type="checkbox"/> |
|-----------------------------|-------------------------------|----------------------------------------------------|

**4.7.1 Falls „JA“, wie gut konnte dies die persönliche Vorstellung in der Spezialsprechstunde ersetzen?**

|                                   |                              |                                  |                                |                                    |                                                    |
|-----------------------------------|------------------------------|----------------------------------|--------------------------------|------------------------------------|----------------------------------------------------|
| Sehr gut <input type="checkbox"/> | Gut <input type="checkbox"/> | Moderat <input type="checkbox"/> | Wenig <input type="checkbox"/> | Gar nicht <input type="checkbox"/> | Weiß nicht / Keine Angabe <input type="checkbox"/> |
|-----------------------------------|------------------------------|----------------------------------|--------------------------------|------------------------------------|----------------------------------------------------|

**4.8 Wünschen Sie sich im Rahmen der Corona-Pandemie mehr Angebote einer kontaktlosen medizinischen Versorgung, wie z.B. Videosprechstunde, Telefonsprechstunde, ausführliche Telefonate oder Ähnliches?**

|                             |                               |                                                    |
|-----------------------------|-------------------------------|----------------------------------------------------|
| Ja <input type="checkbox"/> | Nein <input type="checkbox"/> | Weiß nicht / Keine Angabe <input type="checkbox"/> |
|-----------------------------|-------------------------------|----------------------------------------------------|

**4.9 Kam es aufgrund der Corona-Pandemie zu Terminverschiebungen oder -ausfällen von stationären Terminen für eines Ihrer chronisch kranken Kinder?**

|                                                                        |                                                                |                                                 |                                                                                  |                                                    |
|------------------------------------------------------------------------|----------------------------------------------------------------|-------------------------------------------------|----------------------------------------------------------------------------------|----------------------------------------------------|
| Ja, die Klinik/Praxis hat den Termin abgesagt <input type="checkbox"/> | Ja, ich/wir haben den Termin abgesagt <input type="checkbox"/> | Nein, nicht verschoben <input type="checkbox"/> | Nein, es waren <u>keine</u> stationären Termine geplant <input type="checkbox"/> | Weiß nicht / Keine Angabe <input type="checkbox"/> |
|------------------------------------------------------------------------|----------------------------------------------------------------|-------------------------------------------------|----------------------------------------------------------------------------------|----------------------------------------------------|

**4.9.1 Falls „JA, ich/wir haben den Termin abgesagt“, haben Sie aus Sorge vor einer Ansteckung mit dem Corona-Virus stationäre Termine abgesagt oder verschoben?**

|                             |                               |                                                    |
|-----------------------------|-------------------------------|----------------------------------------------------|
| Ja <input type="checkbox"/> | Nein <input type="checkbox"/> | Weiß nicht / Keine Angabe <input type="checkbox"/> |
|-----------------------------|-------------------------------|----------------------------------------------------|

**4.10 Falls Terminabsagen oder -verschiebungen von ambulanten und/oder stationären Terminen stattfanden:**

**Wie sehr hat dies aus Ihrer Sicht die Gesundheit Ihres Kindes negativ beeinträchtigt?**

|                                     |                                |                                  |                                |                                    |                                                    |                                                                 |
|-------------------------------------|--------------------------------|----------------------------------|--------------------------------|------------------------------------|----------------------------------------------------|-----------------------------------------------------------------|
| Sehr stark <input type="checkbox"/> | Stark <input type="checkbox"/> | Moderat <input type="checkbox"/> | Wenig <input type="checkbox"/> | Gar nicht <input type="checkbox"/> | Weiß nicht / Keine Angabe <input type="checkbox"/> | Nicht zutreffend / Keine Terminabsagen <input type="checkbox"/> |
|-------------------------------------|--------------------------------|----------------------------------|--------------------------------|------------------------------------|----------------------------------------------------|-----------------------------------------------------------------|

**4.11 Haben die behandelnden Ärzte / Therapeuten Ihnen Informationen zum Umgang mit dem Corona-Virus bei ihrem chronischen kranken Kind / Kindern zur Verfügung gestellt?**

|                                                        |                                                          |                                                    |                                                    |
|--------------------------------------------------------|----------------------------------------------------------|----------------------------------------------------|----------------------------------------------------|
| Ja, ausreichend Informationen <input type="checkbox"/> | Ja, aber zu wenig Informationen <input type="checkbox"/> | Nein, keine Informationen <input type="checkbox"/> | Weiß nicht / Keine Angabe <input type="checkbox"/> |
|--------------------------------------------------------|----------------------------------------------------------|----------------------------------------------------|----------------------------------------------------|

**4.11.1 Haben / Hätten sie mehr Bedarf an (z.B. online zugänglichen) Informationen zum Umgang mit dem Corona-Virus bei Ihrem chronisch kranken Kind / Kindern gehabt?**

|                             |                               |                                                    |
|-----------------------------|-------------------------------|----------------------------------------------------|
| Ja <input type="checkbox"/> | Nein <input type="checkbox"/> | Weiß nicht / Keine Angabe <input type="checkbox"/> |
|-----------------------------|-------------------------------|----------------------------------------------------|

**4.12 Hat die Corona-Pandemie insgesamt aus Ihrer Sicht Auswirkungen auf die Gesundheit Ihres chronisch kranken Kindes / meiner chronisch kranken Kinder?**

|                                                    |                                                    |                                                   |                                                    |
|----------------------------------------------------|----------------------------------------------------|---------------------------------------------------|----------------------------------------------------|
| Ja, negative Auswirkungen <input type="checkbox"/> | Ja, positive Auswirkungen <input type="checkbox"/> | Nein, keine Auswirkungen <input type="checkbox"/> | Weiß nicht / Keine Angabe <input type="checkbox"/> |
|----------------------------------------------------|----------------------------------------------------|---------------------------------------------------|----------------------------------------------------|

**4.13 Würden Sie im Falle einer akuten Erkrankung generell bei einem Ihrer Kinder einen Arztbesuch während der Corona-Pandemie, vermeiden oder hinauszögern?**

|                             |                               |                                                    |
|-----------------------------|-------------------------------|----------------------------------------------------|
| Ja <input type="checkbox"/> | Nein <input type="checkbox"/> | Weiß nicht / Keine Angabe <input type="checkbox"/> |
|-----------------------------|-------------------------------|----------------------------------------------------|

**4.14 Würden Sie im Falle einer akuten Erkrankung aber für Sie leichten Problematik (z.B. Husten, Durchfall) bei einem Ihrer Kinder einen Arztbesuch während der Corona-Pandemie, vermeiden oder hinauszögern?**

|                             |                               |                                                    |
|-----------------------------|-------------------------------|----------------------------------------------------|
| Ja <input type="checkbox"/> | Nein <input type="checkbox"/> | Weiß nicht / Keine Angabe <input type="checkbox"/> |
|-----------------------------|-------------------------------|----------------------------------------------------|

**4.15 Würden Sie im Falle einer akuten, für Sie möglicherweise lebensbedrohlichen Erkrankung bei einem Ihrer Kinder einen Arztbesuch während der Corona-Pandemie, vermeiden oder hinauszögern?**

|                             |                               |                                                    |
|-----------------------------|-------------------------------|----------------------------------------------------|
| Ja <input type="checkbox"/> | Nein <input type="checkbox"/> | Weiß nicht / Keine Angabe <input type="checkbox"/> |
|-----------------------------|-------------------------------|----------------------------------------------------|

## Abschnitt „5“ – Familien mit sonst gesunden Kinder / Vorgehen bei gesunden Kindern

### BITTE BEACHTEN:

**Falls Sie nur chronisch kranke Kinder / ein chronisch krankes Kind haben bitte NICHT ausfüllen!**

#### 5.1 War (oder ist) ihr sonst gesundes Kind / Kinder an COVID-19 erkrankt?

|                                                 |                                        |                                                   |                                          |                                                    |
|-------------------------------------------------|----------------------------------------|---------------------------------------------------|------------------------------------------|----------------------------------------------------|
| Ja, mit positivem Test <input type="checkbox"/> | Ja, ohne Test <input type="checkbox"/> | Nein, mit negativem Test <input type="checkbox"/> | Nein, ohne Test <input type="checkbox"/> | Weiß nicht / Keine Angabe <input type="checkbox"/> |
|-------------------------------------------------|----------------------------------------|---------------------------------------------------|------------------------------------------|----------------------------------------------------|

#### 5.2 Kam es aufgrund der Corona-Pandemie zu Terminverschiebungen oder -ausfällen beim Kinderarzt / Hausarzt für eines Ihrer Kinder?

|                                                                        |                                                                |                                                         |                                                                           |                                                    |
|------------------------------------------------------------------------|----------------------------------------------------------------|---------------------------------------------------------|---------------------------------------------------------------------------|----------------------------------------------------|
| Ja, die Klinik/Praxis hat den Termin abgesagt <input type="checkbox"/> | Ja, ich/wir haben den Termin abgesagt <input type="checkbox"/> | Nein, keine Terminverschiebung <input type="checkbox"/> | Nein, kein Arztbesuch war geplant / erforderlich <input type="checkbox"/> | Weiß nicht / Keine Angabe <input type="checkbox"/> |
|------------------------------------------------------------------------|----------------------------------------------------------------|---------------------------------------------------------|---------------------------------------------------------------------------|----------------------------------------------------|

##### 5.2.1 Falls „JA“, welche Art von Vorstellung war geplant?

|                                                                                                   |                                                                                                |                                                                                                         |                                       |
|---------------------------------------------------------------------------------------------------|------------------------------------------------------------------------------------------------|---------------------------------------------------------------------------------------------------------|---------------------------------------|
| Reguläre Vorsorgeuntersuchungen (z.B. U-Untersuchungen, Impfungen, etc.) <input type="checkbox"/> | Akute Vorstellung (z.B. bei Atemwegsinfektion, Bauchschmerzen, etc. ) <input type="checkbox"/> | Sonstiges (z.B. Abholung eines Rezepts, Entschuldigung für den Schulunterricht <input type="checkbox"/> | Keine Angabe <input type="checkbox"/> |
|---------------------------------------------------------------------------------------------------|------------------------------------------------------------------------------------------------|---------------------------------------------------------------------------------------------------------|---------------------------------------|

##### 5.2.2 Falls „JA, ich/wir haben den Termin abgesagt“, haben Sie einen oder mehrere Termine *aus Sorge vor Ansteckung mit dem Corona-Virus* verschoben oder abgesagt?

|                             |                               |                                                    |
|-----------------------------|-------------------------------|----------------------------------------------------|
| Ja <input type="checkbox"/> | Nein <input type="checkbox"/> | Weiß nicht / Keine Angabe <input type="checkbox"/> |
|-----------------------------|-------------------------------|----------------------------------------------------|

##### 5.2.3 Falls „JA“, wie sehr hat die Terminverschiebung oder -ausfall die Gesundheit Ihres Kindes aus Ihrer Sicht negativ beeinträchtigt?

|                                     |                                |                                  |                                |                                    |                                                    |
|-------------------------------------|--------------------------------|----------------------------------|--------------------------------|------------------------------------|----------------------------------------------------|
| Sehr stark <input type="checkbox"/> | Stark <input type="checkbox"/> | Moderat <input type="checkbox"/> | Wenig <input type="checkbox"/> | Gar nicht <input type="checkbox"/> | Weiß nicht / Keine Angabe <input type="checkbox"/> |
|-------------------------------------|--------------------------------|----------------------------------|--------------------------------|------------------------------------|----------------------------------------------------|

#### 5.3 Sollte eines Ihrer Kinder während der Corona-Pandemie stationär in einem Krankenhaus aufgenommen werden?

|                             |                               |                                                    |
|-----------------------------|-------------------------------|----------------------------------------------------|
| Ja <input type="checkbox"/> | Nein <input type="checkbox"/> | Weiß nicht / Keine Angabe <input type="checkbox"/> |
|-----------------------------|-------------------------------|----------------------------------------------------|

**5.3.1 Falls „JA“, haben Sie die stationäre Aufnahme Ihres Kindes aus Sorge vor COVID-19 auf eigenen Wunsch abgelehnt oder haben auf eigenen Wunsch das Krankenhaus früher als geplant verlassen?**

|                             |                               |                                                    |
|-----------------------------|-------------------------------|----------------------------------------------------|
| Ja <input type="checkbox"/> | Nein <input type="checkbox"/> | Weiß nicht / Keine Angabe <input type="checkbox"/> |
|-----------------------------|-------------------------------|----------------------------------------------------|

**5.3.1.1 Falls „JA“, wie sehr hat dies aus Ihrer Sicht die Gesundheit Ihres Kindes negativ beeinträchtigt?**

|                                     |                                |                                  |                                |                                    |                                                    |
|-------------------------------------|--------------------------------|----------------------------------|--------------------------------|------------------------------------|----------------------------------------------------|
| Sehr stark <input type="checkbox"/> | Stark <input type="checkbox"/> | Moderat <input type="checkbox"/> | Wenig <input type="checkbox"/> | Gar nicht <input type="checkbox"/> | Weiß nicht / Keine Angabe <input type="checkbox"/> |
|-------------------------------------|--------------------------------|----------------------------------|--------------------------------|------------------------------------|----------------------------------------------------|

**5.4 Würden Sie im Falle einer akuten Erkrankung generell bei einem Ihrer Kinder einen Arztbesuch während der Corona-Pandemie, vermeiden oder hinauszögern?**

|                             |                               |                                                    |
|-----------------------------|-------------------------------|----------------------------------------------------|
| Ja <input type="checkbox"/> | Nein <input type="checkbox"/> | Weiß nicht / Keine Angabe <input type="checkbox"/> |
|-----------------------------|-------------------------------|----------------------------------------------------|

**5.5 Würden Sie im Falle einer akuten Erkrankung aber für Sie leichten Problematik (z.B. Husten, Durchfall) bei einem Ihrer Kinder einen Arztbesuch während der Corona-Pandemie, vermeiden oder hinauszögern?**

|                             |                               |                                                    |
|-----------------------------|-------------------------------|----------------------------------------------------|
| Ja <input type="checkbox"/> | Nein <input type="checkbox"/> | Weiß nicht / Keine Angabe <input type="checkbox"/> |
|-----------------------------|-------------------------------|----------------------------------------------------|

**5.6 Würden Sie im Falle einer akuten, für Sie möglicherweise lebensbedrohlichen Erkrankung bei einem Ihrer Kinder einen Arztbesuch während der Corona-Pandemie, vermeiden oder hinauszögern?**

|                             |                               |                                                    |
|-----------------------------|-------------------------------|----------------------------------------------------|
| Ja <input type="checkbox"/> | Nein <input type="checkbox"/> | Weiß nicht / Keine Angabe <input type="checkbox"/> |
|-----------------------------|-------------------------------|----------------------------------------------------|

**5.7 Hat die Corona-Pandemie insgesamt aus Ihrer Sicht Auswirkungen auf die Gesundheit Ihres Kindes / Ihrer Kinder?**

|                                                       |                                                       |                                                      |                                                    |
|-------------------------------------------------------|-------------------------------------------------------|------------------------------------------------------|----------------------------------------------------|
| Ja, negative<br>Auswirkungen <input type="checkbox"/> | Ja, positive<br>Auswirkungen <input type="checkbox"/> | Nein, keine<br>Auswirkungen <input type="checkbox"/> | Weiß nicht / Keine Angabe <input type="checkbox"/> |
|-------------------------------------------------------|-------------------------------------------------------|------------------------------------------------------|----------------------------------------------------|

**Vielen Dank!**
